# Supplementary material for: Optimization of Carob Products Preparation for Targeted LC-MS/MS Metabolomics Analysis
Source: MDPI journal article supplement (doi:10.3390/metabo13050645), 2023-05-09
Supplement: s1 [file s1]

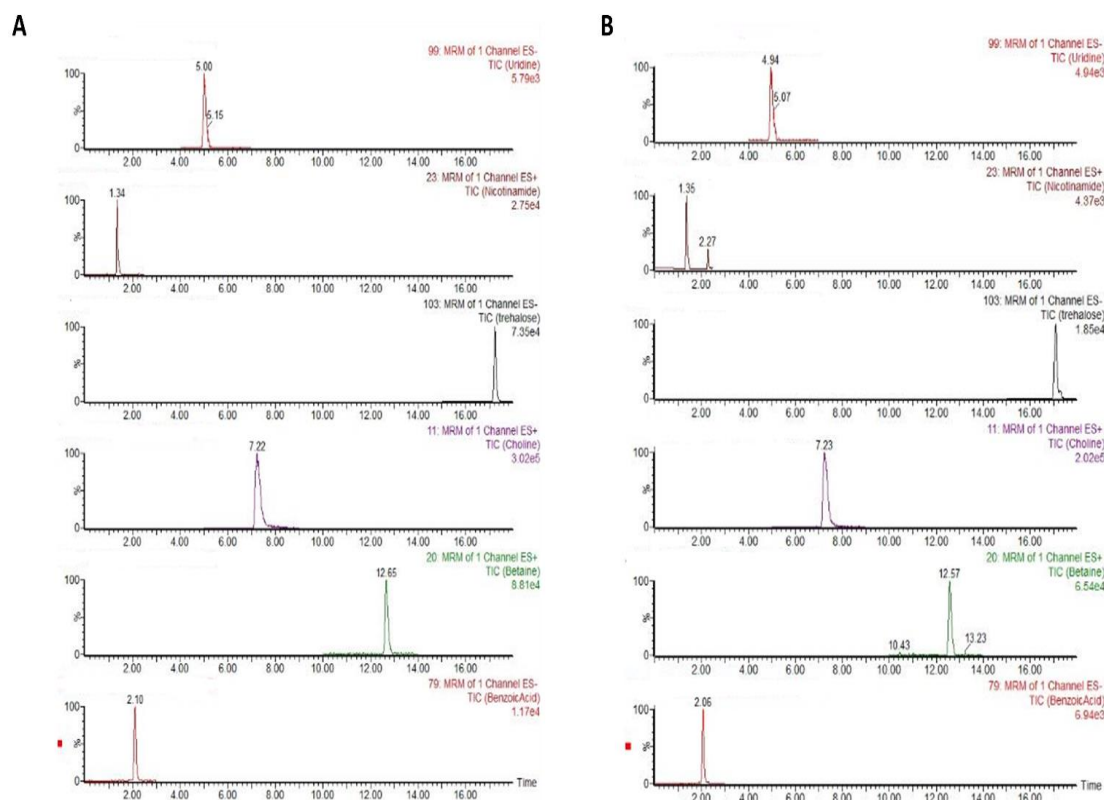

Figure S1: Chromatograms of uridine, nicotinamide, trehalose, choline, betaine and benzoic acid of powder (A) and a syrup (B) products, after the extraction with the respective optimal conditions.
